# Supplementary material for: Pharmacokinetic Analysis of Carnosic Acid and Carnosol in Standardized Rosemary Extract and the Effect on the Disease Activity Index of DSS-Induced Colitis
Source: PubMed Central journal article supplement (PMC7997407; doi:10.3390/nu13030773), 2021-02-27
Supplement: nutrients-13-00773-s001.pdf [file nutrients-13-00773-s001.pdf]

Table S1. Average weights of colons and spleens from DSS-mice treated with RE (n=7 mice per group).

| Group   | Colon weight (g) |        | Spleen weight (g) |        |
|---------|------------------|--------|-------------------|--------|
|         | Mean             | St dev | Mean              | St dev |
| Control | 0.49             | 0.067  | 0.08              | 0.009  |
| Colitis | 0.46             | 0.065  | 0.10              | 0.018  |
| RE10    | 0.45             | 0.080  | 0.11              | 0.026  |
| RE100   | 0.48             | 0.042  | 0.10              | 0.021  |
